# Supplementary material for: Exposure to House Dust Mite Allergen and Endotoxin in Early Life and Sensitization and Allergic Rhinitis: The JECS
Source: MDPI journal article supplement (doi:10.3390/ijerph192214796), 2022-11-10
Supplement: s1 [file s1]

**Table S1.** Log-transformed IgE to house dust mite allergen in relation to endotoxin or Der 1 exposure in dust (multivariate linear regression analysis).

|                                                               | Der f 1 sensitization |             |                  | Der p 1 sensitization |             |                  |
|---------------------------------------------------------------|-----------------------|-------------|------------------|-----------------------|-------------|------------------|
|                                                               | Coefficient           | SE          | P value          | Coefficient           | SE          | P value          |
| Endotoxin (EU/m <sup>2</sup> , log <sub>10</sub> transformed) | <b>0.49</b>           | <b>0.05</b> | <b>&lt; 0.01</b> | <b>0.72</b>           | <b>0.06</b> | <b>&lt; 0.01</b> |
| Der 1 (ng/m <sup>2</sup> , log <sub>10</sub> transformed)     | <b>0.14</b>           | <b>0.04</b> | <b>&lt; 0.01</b> | 0.07                  | 0.05        | 0.12             |

SE, standard error. Model was adjusted for parental history of allergy, passive smoking, house income, mode of delivery, birth weight, child sex, older siblings, exclusive breast feeding, daycare attendance at one year, and household pet. Boldface indicates statistical significance ( $p < 0.05$ ).

**Table S2.** Odds ratios of sensitization to Der1 in relation to endotoxin or Der 1 exposure in the season status subgroup.

|                                        |                  | Der f 1 sensitization |              |             | Der p 1 sensitization |              |             |
|----------------------------------------|------------------|-----------------------|--------------|-------------|-----------------------|--------------|-------------|
|                                        |                  | aOR                   | 95%CI        |             | aOR                   | 95%CI        |             |
| Fall and winter (October to March)     |                  |                       |              |             |                       |              |             |
| Endotoxin (EU/m <sup>2</sup> )         |                  |                       |              |             |                       |              |             |
| Q1                                     | < 186.9          | ref                   |              |             | ref                   |              |             |
| Q2                                     | ≥ 186.9, < 375.1 | 1.25                  | 0.79,        | 1.99        | 1.26                  | 0.79,        | 2.00        |
| Q3                                     | ≥ 375.1, < 826.5 | 1.34                  | 0.86,        | 2.11        | 1.26                  | 0.80,        | 1.99        |
| Q4                                     | ≥ 826.5          | <b>1.61</b>           | <b>1.04,</b> | <b>2.50</b> | <b>1.74</b>           | <b>1.12,</b> | <b>2.70</b> |
| Der 1 (ng/m <sup>2</sup> )             |                  |                       |              |             |                       |              |             |
| Q1                                     | < 14.8           | ref                   |              |             | ref                   |              |             |
| Q2                                     | ≥ 14.8, < 51.2   | 1.00                  | 0.66,        | 1.54        | 1.14                  | 0.75,        | 1.76        |
| Q3                                     | ≥ 51.2, < 168.6  | <b>1.69</b>           | <b>1.14,</b> | <b>2.52</b> | <b>1.86</b>           | <b>1.24,</b> | <b>2.79</b> |
| Q4                                     | ≥ 168.6          | <b>2.88</b>           | <b>1.93,</b> | <b>4.29</b> | <b>2.99</b>           | <b>1.99,</b> | <b>4.50</b> |
| Spring and summer (April to September) |                  |                       |              |             |                       |              |             |
| Endotoxin (EU/m <sup>2</sup> )         |                  |                       |              |             |                       |              |             |
| Q1                                     | < 186.9          | ref                   |              |             | ref                   |              |             |
| Q2                                     | ≥ 186.9, < 375.1 | 1.13                  | 0.70,        | 1.83        | 1.25                  | 0.77,        | 2.01        |
| Q3                                     | ≥ 375.1, < 826.5 | 1.06                  | 0.63,        | 1.78        | 1.09                  | 0.64,        | 1.86        |
| Q4                                     | ≥ 826.5          | 1.32                  | 0.73,        | 2.36        | 1.28                  | 0.70,        | 2.33        |
| Der 1 (ng/m <sup>2</sup> )             |                  |                       |              |             |                       |              |             |
| Q1                                     | < 14.8           | ref                   |              |             | ref                   |              |             |
| Q2                                     | ≥ 14.8, < 51.2   | 1.28                  | 0.65,        | 2.53        | 1.01                  | 0.51,        | 2.00        |
| Q3                                     | ≥ 51.2, < 168.6  | 1.70                  | 0.88,        | 3.29        | 1.79                  | 0.95,        | 3.38        |
| Q4                                     | ≥ 168.6          | <b>3.45</b>           | <b>1.79,</b> | <b>6.62</b> | <b>2.76</b>           | <b>1.46,</b> | <b>5.24</b> |

Abbreviations: CI, confidence interval; OR, odds ratio. Model 1: crude; Model 2: Adjusted for parental allergy history, passive smoking, household income, mode of delivery, birth weight, child's sex, older siblings, exclusive breastfeeding, daycare attendance at 1 year, and household pet. Boldface indicates statistical significance ( $p < 0.05$ ).
